# Supplementary material
Source: publisher site journal article supplement (https://www.dovepress.com/article/558274)
Supplement: Supplementary file 1 [file 558274%20Supplementary%20Material.docx]

**Supplemental Materials**

**Supplemental methods**

**Density gradient centrifugation**

Mouse heart was quickly sampled, cut into pieces with clean scissors and forceps, digested by type II collagenase at 37°C for 20-30 min, and prepared a cardiac single-cell suspension. Prepared different concentrations of percoll isolate (Solarbio, China) according to the instructions, diluted the percoll separation solution to two liquids, high density (1.107g/ml) and low density (0.407g/ml) by Nacl solution, and slowly added to the high density liquid. Then add the cell suspension, the layering effect is visible, centrifugation, the cardiomyocyte layer and fibroblast layer are visible, carefully aspirate, PBS wash twice, and then add trizol to extract RNA.

**Flow cytometry sorting**

Mouse heart was quickly sampled, cut into pieces with clean scissors and forceps, digested by type II collagenase at 37°C for 20-30 min, and prepared a cardiac single-cell suspension. Lysed red blood cells, FcγR blockade, and stained cell surface markers at 4°C for 20-30 min, including: Anti-CD45 antibody, anti-F4/80 antibody, anti-CD11b antibody, anti-CD31 antibody (all of the above antibodies are purchased from elabscience).

Gate sorting strategy: macrophages CD45+F4/80+CD11b+, endothelial cells: CD45-CD31+. After obtaining macrophages and endothelial cells, trizol was added to extract RNA.

**Real‑time qPCR (RT–qPCR)**

Total RNA of tissue and cell samples was extracted using Trizol reagent (Vazyme, China) as per the instructions. Then draw 1ug of RNA and use PrimeScriptTM RT reagent Kit with gDNA Eraser (Perfect Real Time) according to the manufacturer's instructions (Takara Biomedical Technology, China) performs reverse transcription to generate cDNA. Real-time fluorescence quantification was performed using TB® Green Premix Ex TaqTM (Tli RNaseH Plus)(Takara Biomedical Technology, China), and the sample addition method was in accordance with the instructions. Taking GAPDH as the internal reference. The primer sequences are shown inSupplemental Table 1.

**Supplemental Table 1**

Primers used in this experiment. (m,mouse. h,human)

| Primers | Sequence 5′-3′ |
| --- | --- |
| m GAPDH-F  m GAPDH-R  m CMTM3-F  m CMTM3-R  m IL-1β-F  m IL-1β-R  m IL-6-F  m IL-6-R  m TNF-α-F  m TNF-α-R  m α-SMA-F  m α-SMA-R  m Collagen I-F  m Collagen I-R  m Collagen III-F  m Collagen III-R  h GAPDH-F  h GAPDH-R  h CMTM3-F  h CMTM3-R | AGGAGAGTGTTTCCTCGTCC  GAGGTCAATGAAGGGGTCGT  ATCTCCATCACTGCTGTCGC  CTGTCCTATGGGCTGTGGTC  AAGCCTCGTGCTGTCGGACC  TGAGGCCCAAGGCCACAGGT  ACGATGATGCACTTGCAGAAA  CTGTGATCCAGCTTATCTCTTG  CCCTCACACTCACAAACCAC  ATAGCAAATCGGCTGACGGT  AGGGAGTAATGGTTGGAATGG  GGTGATGATGCCGTGTTCTA TGACTGGAAGAGCGGAGAGT GACGGCTGAGTAGGGAACAC AGCCACCTTGGTCAGTCCTA GTGTAGAAGGCTGTGGGCAT  AATTCCATGGCACCGTCAAGG  TGCAAATGAGCCCCAGCCT  CTATGTGGCGTCCTCAGCAT  ATGGCCGTGATGGAGATAGC |

**Immunofluorescence**

The cardiac tissue was cut into 4-um thick sections and subjected to gradient dewaxing. Then, it was placed in the sodium citrate antigen repair solution and heated for 25 min for antigen repair. 1% Triton X-100 (Sparkjade, China) was added and incubated for 10 min. After blocking with serum, Add an appropriate amount of diluted primary antibodies from different species (anti-CMTM3 antibody (1:50, bioss, China), anti-CD68 antibody (1:100, abways, China), anti-α-actinin antibody (1:100, CST, America), anti-FSP-1 antibody (1: 100, proteintech, China), anti-CD31 antibody (1:100, proteintech, China) was incubated overnight at 4℃. The next day, the rabbit/mouse secondary antibody labeled with fluorescein (1:300, CST, America) was incubated in the dark for 1 h, and the tablets were sealed with the anti-fluorescence quencher containing DAPI (Beyotime, China). Images were collected by a fully automatic inverted fluorescence microscope (Axio Observer7, Carl Zeiss, Germany).

For BMDMs, fix the samples with 4% paraformaldehyde for 30 minutes, add 1% Triton X-100 and incubate for 10 minutes. Then, block with 5%BSA at room temperature for 1-2 hours. Cells were treated with primary antibodies (including anti-NF -κb antibody (1:400, CST,American) and anti-PPAR α antibody (1:500,proteintech,China) at 4°C and incubated overnight. After washing with PBS, the cells were exposed to the rabbit/mouse secondary antibody labeled with fluorescein (1:300, CST, America) at room temperature in the dark for 1 hour. Then the plates were sealed with anti-fluorescence quenching solution (containing DAPI) (Beyotime, China). Images were captured using the fully automatic inverted fluorescence microscope (Axio Server 7, Carl Zeiss, Germany).

**Flow cytometry analysis**

For primary macrophages, the cells were digested with 0.25% trypsin to prepare the BMDMs suspension, centrifuged, washed with PBS, treated with anti-CD16/32 antibody (Elabscience, China) for 10 minutes to block the Fcγ receptor, and the primary antibody was stained at 4 ° C for 20-30 minutes in the dark, including: anti-CD11b and anti-CD86. Detection was performed using the MoFlo XDP flow cytometer (Beckman) and analysis was conducted using the Flowjo software. Gating strategy: Pro-inflammatory macrophages: CD11b+CD86+.

**Immunohistochemistry staining**

The cardiac tissue was cut into 4-um thick sections and subjected to gradient dewaxing. Then, it was placed in sodium citrate antigen repair solution and heated for 20-30 minutes for antigen repair. After cooling to room temperature, it was blocked with hydrogen peroxide solution for 10 minutes, blocked with 5% donkey serum for 2 hours, and anti-CMTM3 antibody was added (1: 50) bioss, China or anti-CD68 antibody (1:100, abways, China) overnight at 4 ° C. The next day, the sheep anti-rabbit/mouse IgG secondary antibody conjugated with HRP was incubated for 1-2 hours (1:500, Sangon, China), then the color was developed with DAB. Finally, the nuclei were stained with hematolin solution, the plates were sealed, and the staining was observed and taken under a microscope (Leica Microsystems, America).

**HE**

The cardiac tissue was cut into 4-um thick slices and subjected to gradient dewaxing. Hematoxylin staining solution was used for several minutes, differentiation solution was used for several seconds, and it turned blue in tap water for 15 minutes. Eosin staining solution was used for 30 seconds to 2 minutes, and it was rinsed and soaked in tap water for several minutes. Then, gradient dehydration was carried out. Xylene became transparent and neutral gum was used for sealing. Observe and photograph under a microscope (Leica Microsystems, America).

**Masson**

The cardiac tissue was cut into 4 μm thick sections and subjected to gradient dewaxing. The mordant was immersed overnight, then successively stained with celestite blue for 2-3 minutes, hematoxylin for 2-3 minutes, acidic differentiation solution for several seconds, and then rinsed with tap water to return blue. Subsequently, it was successively stained with Lichen fuchsin for 5-10 minutes, treated with phosphomolybdic acid for 5-10 minutes, and aniline blue for 3-5 minutes Rinsing and covering with weak acid solution for 2 minutes, followed by gradient dehydration. Xylene became transparent and neutral gum was sealed. The collagen area was observed, photographed and calculated under a microscope (Leica Microsystems, America).

**Extraction of mononuclear cells from human peripheral blood(PBMCs)**

Take 2ml of fresh blood samples and add an equal volume of balanced salt solution. Extract peripheral blood mononuclear cells according to the instructions of Ficoll-Paque(cytiva, China), and subsequently extract RNA.

**H9C2 Cell culture and transfection**

Rat H9C2 cardiomyocytes were cultured in DMEM medium containing penicillin (100U/mL), streptomycin (100μg/mL) and 10% bovine serum. Si-RNA negative control (si-NC) and si-CMTM3 were purchased from Hippobio. H9C2 cell were seeded into well plates and were transfected when grown to 70%-80%. For specific operation steps, follow the Lipofectamine 3000 (invitrogen, America) manual. Incubation was continued for 24h-48h after transfection. Then, H9C2 was incubated in a three-gas incubator at 37°C, 5 % CO2, 1 % O2, and 94 % N2 for 6-8 h to construct a hypoxia model.

**Supplemental Figure**

**
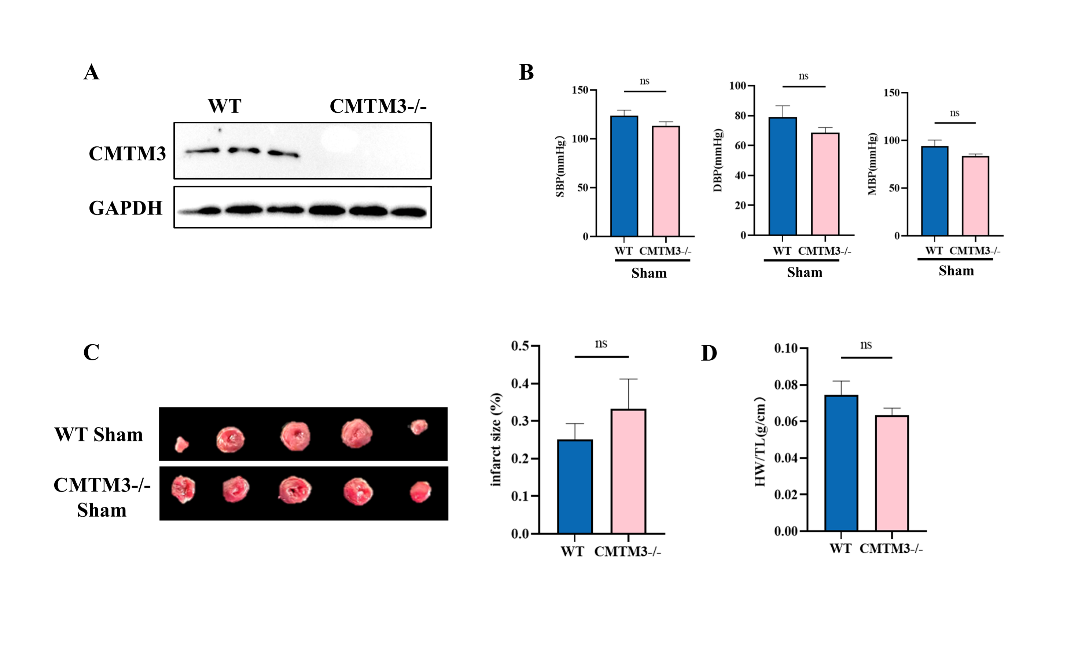
**

**Supplemental Fig. 1** CMTM3 deficiency in the basal state has no effect on cardiac function. (A) Western blot was used to detect CMTM3 expression in the heart tissues of WT and CMTM3-/- mice (n = 3); (B) Measure the systolic blood pressure, diastolic blood pressure and average blood pressure of the two groups of mice (n = 3); (C) TTC staining compare the hearts of WT and CMTM3-/- mice in the sham operation group (n = 3); (D) Measure HW/TL under the basic state (n = 3). ns. no significance


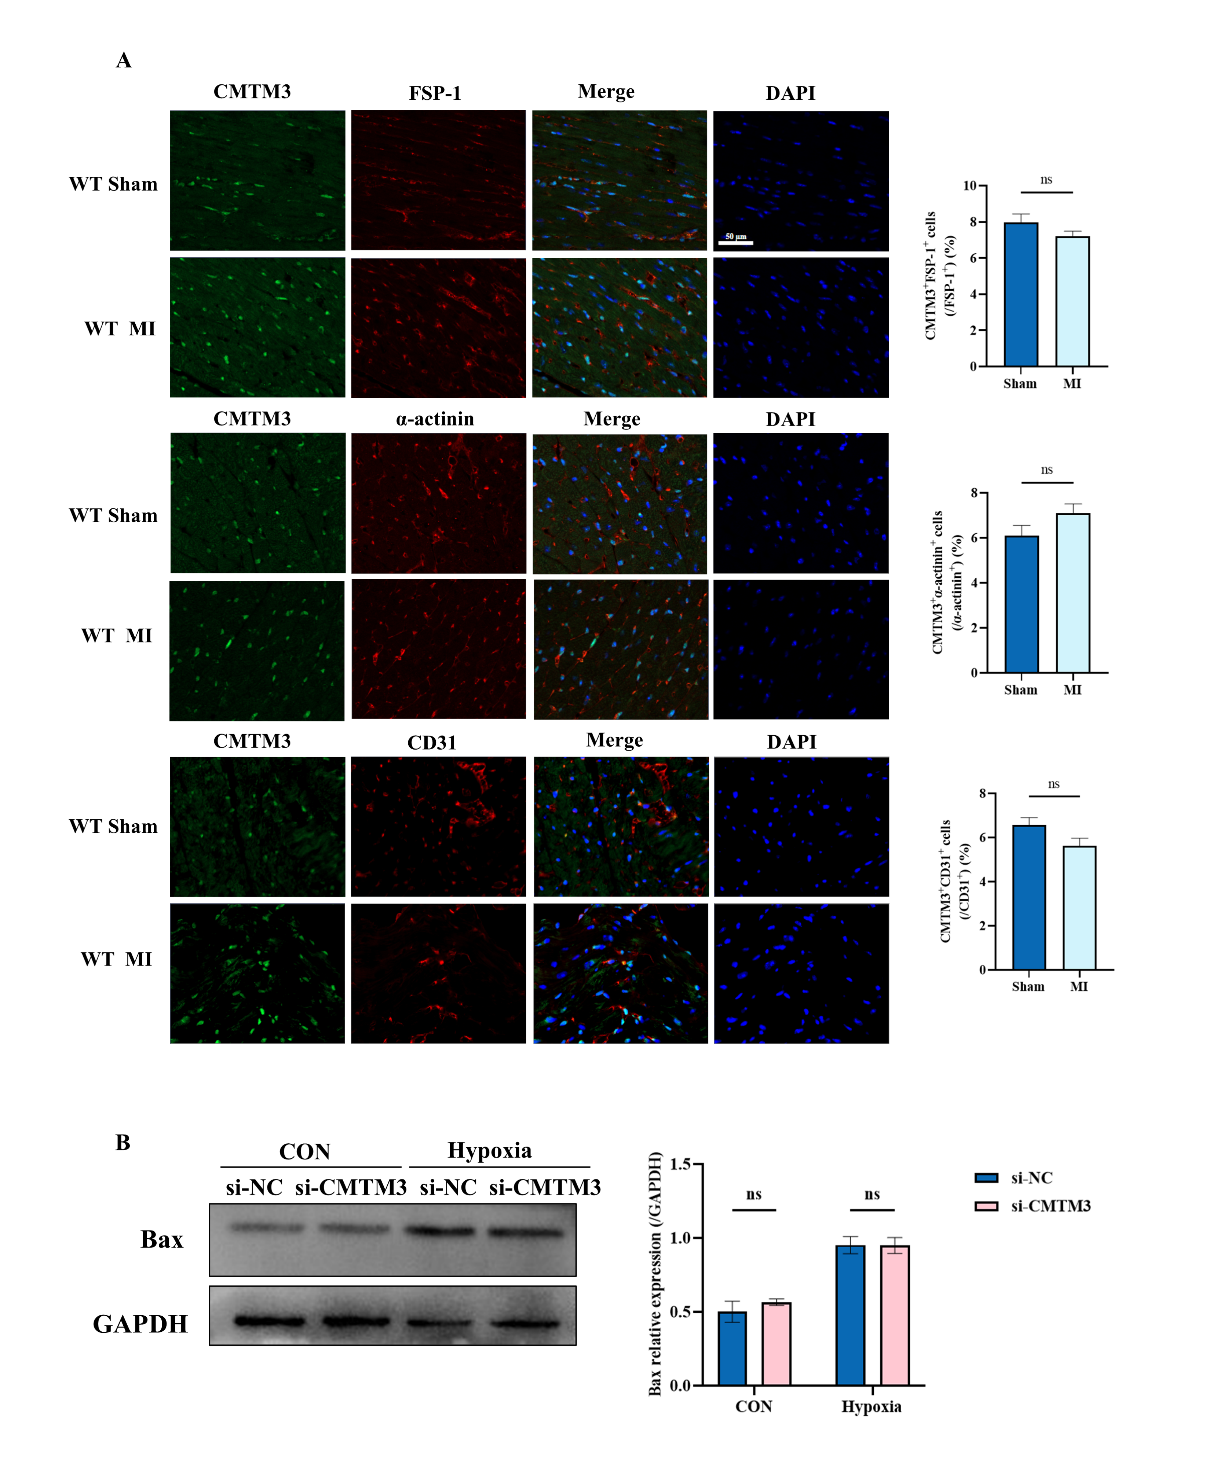


**Supplemental Fig. 2** CMTM3 is upregulated in macrophages after MI.

(A) CMTM3(green) was co-stained with fibroblast markers FSP-1(red) and DAPI(blue) for immunofluorescence in cardiac sections of the MI and sham operation groups, and the percentage of CMTM3+FSP-1+ cells in FSP-1+ cells was calculated (n = 3); CMTM3(green) was co-stained with cardiomyocyte markers α-actinin(red) and DAPI(blue) for immunofluorescence in cardiac sections of the MI and sham operation groups, and the percentage of CMTM3+α-actinin+ cells in α-actinin+ cells was calculated (n = 3); CMTM3 (green) was co-stained with endothelial cell markers CD31(red) and DAPI(blue) for immunofluorescence in cardiac sections of the MI and sham operation groups, and the percentage of CMTM3+CD31+ cells among CD31+ cells was calculated (n = 3). Scale bars,50um; (B) Western blot was used to detect the expression of Bax in H9C2 cells in different treatment groups (n = 3). ns.no significance


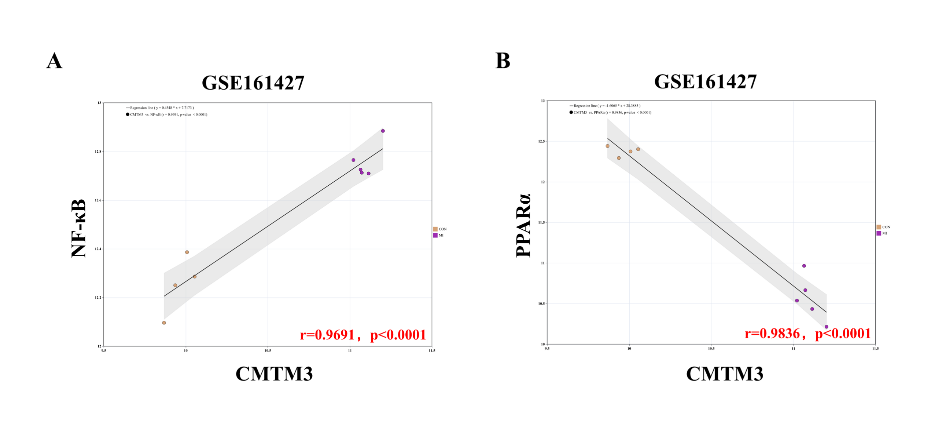


**Supplemental Fig. 3** CMTM3 is significantly associated with NF-κB and PPARα.

(A) Correlation analysis of CMTM3 expression with NF-kB expression (n=4-5); (B) Correlation analysis of CMTM3 expression with PPARα expression (n=4-5).
